# Supplementary material for: Personalized Circulating Tumor DNA Biomarkers Dynamically Predict Treatment Response and Survival In Gynecologic Cancers
Source: PLoS One. 2015 Dec 30;10(12):e0145754. doi: 10.1371/journal.pone.0145754 (PMC4696808; doi:10.1371/journal.pone.0145754)
Supplement: S1 Table — Samples interrogated by WES are highlighted with an asterisk. All mutations shown were confirmed by Sanger sequencing of the relevant tumor sample. (XLSX) [file pone.0145754.s004.xlsx]

## Sheet: Sheet1 (2)
PATIENT NUMBER	CHROMOSOME	REFERENCE / ALTERNATIVE ALLELE	GENE NAME	FORWARD PRIMER SEQUENCE	REVERSE PRIMER SEQUENCE	WILD TYPE PROBE	MUTANT PROBE
PT 66	17:7578190	T/C	TP53	HS00000906 *
PT 67*	11:69957869	G/GT	ANO1	NA
PT 67*	17:7577518	GATGGTGA/-	TP53	NA
PT 78	12:25398284	C/A	KRAS	GCTGTATCGTCAAGGCACTCTT	AGGCCTGCTGAAAATGACTGAATAT	TTGGAGCTGGTGGCGTA	TTGGAGCTGTTGGCGTA
PT 87*	(10:123243211) (1:28053982)	Translocation	FGFR2-FAM76A	CTGTGCTGGATAAAGGAAGAGATTG	CTGTTGATGTGGGAGTTAAGTAAGAACT		TGAAAGGAAAGGAACATATGTTTGTTTTACAATTTA
				CTGTGCTGGATAAAGGAAGAGATTG	GAAACAACAATTTTGGCAGAAGAAG	AGAAGTTGAAAGGAAAGGAACGGTTCAA
PT 87*	2:220338265	C/A	SPEG	GGCCCCTGCCATGCT	GCTGTCCCTCCACCACATAC	ACGATGTCTGGTTTGTC	ACGATGTCTTGTTTGTC
PT 87*	2:28081408	T/G	RBKS	ACCTTTCCCTCCAAAGCCAATAAAA	ACAATAGTCTTACTTCTCGTTTGCCAAA	ACTGGAGAAACCATCC	CTGGAGACACCATCC
PT 87*	3:36897567	T/G	TRANK1	GGGTCCAGTGGTTTGTAATGACTA	GCCAGGAGGTACAAAGGAATTTCAT	CCAAGTCCACCAAGGC	CCAAGTCCCCCAAGGC
PT 102	17:7579472	T/C	TP53	NA
PT 105	17:7578271	T/C	TP53	CCACACGCAAATTTCCTTCCA	GATTCCTCACTGATTGCTCTTAGGT	TCCTCAGCATCTTATC	CCTCAGCGTCTTATC
PT 137	17:7578476	CTGTGTTATCTCCTAGGTTGGCTCTGA/-	TP53	CTGCTTGCCACAGGTCTCC	CCATGCAGGAACTGTTACACATG	GCCTGTGTTATCTCCTAGGTTGGCTCTGAC	GCCTCATCTTGGGCCTGTACCACC
PT 158	17:7577538	C/T	TP53	CCAGTGTGATGATGGTGAGGAT	AACTACATGTGTAACAGTTCCTGCAT	CATGAACCGGAGGCC	CATGAACCAGAGGCC
PT 165*	10:70450636	G/GAC	TET1	GTAAAAAGTGAAACCGAACCCCATT	GGATGGCATCAGCGAATAAGTTTTA	CTTAAAAAGTTCAGACAACAC	AAGTTCAGACACAACAC
PT 165*	22:41647414-41647302	GTCAGAGCCAACCTAGGAGATAACACAG/G	RANGAP-PVLAP	CATTCACTCATTCATTCCCTCTCT	CGGGCACAGAGTTGCTACTCA		AAGGCATCAACTAAACTCTTCTAACAGATCCAGC
				CATTCACTCATTCATTCCCTCTCT	GCAAGAACAGGTCCTGCCTTAC	GCAGGCCAAATCCAAGCCAGACTC
PT 175	17:7578406	C/T	TP53	ACAGCACATGACGGAGGTT	CTGCTCACCATCGCTATCTGA	TGAGGCGCTGCCC	TGAGGCACTGCCC
PT 175	3:178952074	G/T	PIK3CA	HS00000829 *
PT 181	17:7577085	C/T	TP53	GGTGAGGCTCCCCTTTCTTG	TGCCTGTCCTGGGAGAGA	CGCACAGAGGAAGAG	CGCACAAAGGAAGAG
PT 186	17:7578406	C/T	TP53	ACAGCACATGACGGAGGTT	CTGCTCACCATCGCTATCTGA	TGAGGCGCTGCCC	TGAGGCACTGCCC
PT 189	1:152692401	G/T	C1orf68	TGCCAGACCCAGACGTG	CTTGCAGGAGCTTGAACATAATAGC	ATGTCCAGGGTGCTTC	ATGTCCATGGTGCTTC
PT 189	1:35562956	C/T	ZMYM1	ACTGCAGGCATTCAGCTTTCT	GTGGTTGAAACTGAAGGAAGCATTT	CGCCAGATGATGCCAG	CGCCAGATAATGCCAG
PT 189	22:46931061	G/A	CELSR1	ACGTCCAGCACCGTGATG	GGAGGCGGTGGACCAC	TGGTGGAGGAGCTCAT	TGGTGGAGAAGCTCAT
PT 208*	17:37627315	TGCTG/T	CDK12	AGGCTTCCACTTAATTCCAG	GCCTCTACTGAACTGTTCTC		AAAGAGCAGCTGCTGCTCAGC
				AGGCTTCCACTTAATTCCAG	GCCTCTATGAACTGTTCTC	AAAGAGCAGCTGCTGCTGCTG
PT 208*	8:62596692	TG/T	ASPH	CAGCAATGCAATCACCATAAACCA	GGACACAAGAATGGGAGGAAAGG	CAGGAACTTCATTCTTC	TCAGGAACTTATTCTTC
PT 208*	17:7577539	G/A	TP53	GAGTCTTCCAGTGTGATGATGGT	AACTACATGTGTAACAGTTCCTGCAT	TGGGCCTCCGGTTCA	TGGGCCTCCAGTTCA
PT 211*	17:7577124	C/A	TP53	GCTTCTCTTTTCCTATCCTGAGTAGTG	CTCCCAGGACAGGCACAAA	CAGCTTTGAGGTGCGTG	CAGCTTTGAGTTGCGTG
PT 211*	5:167674200	A/G	ODZ2	CAGATCTACAGGTTCTCCGAGGAA	GCTGTTGTCATGATAGGTGTAGTCA	CCTGGCATTGACCATG	CTGGCATCGACCATG
PT 211*	11:64517848	C/A	PYGM	CCACAGCTCCTCCAAGTGTTTT	GTCCCAGCAGCTGATGGA	AGCAGAAGGAGGATATTG	AGCAGAAGGAGTATATTG
PT 214*	7:142561975	C/G	EPHB6	GGGAGACCTTCACCCTTTACTAC	AGGTGCCAGGAGGAAACG	TCAGGGCTGTCGGGCT	TCAGGGCTCTCGGGCT
PT 214*	2:58468365	G/A	FANCL	CACTGGGCGGGTACCT	CCCCAGAACCGGTCGAAAA	CCGAGATGAATCCCT	CCGAGATAAATCCCT
PT 214*	22:39621834	C/T	PDGFB	GACTCGCACCGTCCGAAT	ACATGCTGACGAGGTCTTTCTTTT	CCCAAACTCGGGTGACC	CCCAAACTCAGGTGACC
PT 215	4:153247289	G/A	FBXW7	ACAACCCTCCTGCCATCATATTG	AGGCCAGTGTTTACATGTTTTGATG	AACACAGCGGACTGC	ACACAGCAGACTGC
PT 215	17:7578406	C/T	TP53	ACAGCACATGACGGAGGTT	CTGCTCACCATCGCTATCTGA	TGAGGCGCTGCCC	TGAGGCACTGCCC
PT 217	17:7578457	CG/C	TP53	TGTGCTGTGACTGCTTGTAGATG	GCAGCTGTGGGTTGATTCCA	CGCGTCCGCGCCAT	CGCGTCGCGCCAT
PT 218*	12:114397963	GCAAGTCATT/-	RBM19	NA
PT 229	17:7577574	T/C	TP53	HS00000906 *
PT 229	7:116339690	C/G	MET	GCCAGTGTCCTGACTGTGT	AAGAAGTTGATGAACCGGTCCTTT	ACAGATGAAAGGACTTTG	CAGATGAAAGCACTTTG
PT 230*	3:30732970	G/C	TGFBR2	NA
PT 230*	9:117849382	C/T	TNC	AGCTGGCTGCAGTCCTC	GCATTGATGGGCAGTGCAT	TGACGACGGCTTCAC	TGACGACAGCTTCAC
PT 230*	14:104165341	G/A	XRCC3	GAGCTGGTTAGCCCAGGTTATG	TTGCCTGCTTCCTGTTTCTCA	CTGGGACGAACGTGTTT	CTGGGACGAATGTGTTT
PT 234	3:178916876	G/A	PIK3CA	CTCAAGAAGCAGAAAGGGAAGA	AGGGTTGAAAAAGCCGAAGGT	ATGAAACAAGACGACTTTG	AAACAAGACAACTT
PT 234	17:7578265	A/G	TP53	CATCCAAATACTCCACACGCAAATT	GATTCCTCACTGATTGCTCTTAGGT	TCCACTCGGATAAGAT	TCCACTCGGGTAAGAT
PT 245	17:7577121	G/A	TP53	CTGTGCGCCGGTCTCT	CTACTGGGACGGAACAGCTT	CACAAACACGCACCTCA	CACAAACACACACCTCA
PT 247	3:178952085	A/G	PIK3CA	GCAAGAGGCTTTGGAGTATTTCATG	GCTGTTTAATTGTGTGGAAGATCCAA	CCACCATGATGTGCATC	CACCATGACGTGCATC
PT 250	12:25398280	C/T	KRAS	HS00000131 *
PT 251	10:89692838	C/T	PTEN	CCCACCACAGCTAGAACTTATCAAA	GTGAATTGCTGCAACATGATTGTCA	ATTGGTCAAGATCTTC	TTGGTCAAAATCTTC
PT 251	3:178927425	T/C	PIK3CA	ACATAGGTGGAATGAATGGCTGAATT	CAGAGCAAATGGAAAGGCAAAGTC	CACGAGGAAGATCAG	ACGAGGGAGATCAG
PT 253	10:89717611	T/C	PTEN	GGCATTTCCTGTGAAATAATACTGGTATGT	CACCTTTAGCTGGCAGACCA	CAAACTGAGGATCTGCA	CAAACTGAGGGTCTGCA
PT 253	3:178921552	A/G	PIK3CA	CCCTTTGGGTTATAAATAGTGCACTCA	AGCATCAGCATTTGACTTTACCTTATCA	AACCTACGTGAATGTAAAT	CCTACGTGAGTGTAAA
PT 259	10:89711927	T/G	PTEN	CAGTCAGAGGCGCTATGTGTATTAT	AAACAACAGTGCCACTGGTCTA	CCAGATGATTCTTTAACAGGTA	CAGATGATTCTTTCACAGGTA
PT 259	3:178916944	A/G	PIK3CA	CAGTCAGAGGCGCTATGTGTATTAT	AAACAACAGTGCCACTGGTCTA	CCAGATGATTCTTTAACAGGTA	CAGATGATTCTTTCACAGGTA
PT 267	17:7577079	C/CA	TP53	GGTGAGGCTCCCCTTTCTTG	TGCCTGTCCTGGGAGAGA	ACAGAGGAATGAGAATC	CAGAGGAAGAGAATC
PT 267	7:140453155	C/T	BRAF	CCACTCCATCGAGATTTCACTGTA	CTGTTTTCCTTTACTTACTACACCTCAGAT	CAGTAAAAATAGGTGATTTTG	AGTAAAAATAGGTAATTTTG
PT 271	7:116411923	C/T	MET	CTCTGTTTTAAGATCTGGGCAGTGA	GCCTATCCAAATGAGGAGTGTGTAC	CATCGTAGCGAACTAA	CATCGTAGCAAACTAA
PT 279	17:7577539	G/A	TP53	GAGTCTTCCAGTGTGATGATGGT	AACTACATGTGTAACAGTTCCTGCAT	TGGGCCTCCGGTTCA	TGGGCCTCCAGTTCA
PT 301	17:7578271	T/C	TP53	CCACACGCAAATTTCCTTCCA	GATTCCTCACTGATTGCTCTTAGGT	TCCTCAGCATCTTATC	CCTCAGCGTCTTATC
PT 304	17:7577138	C/G	TP53	NA
PT 310	17:7579377	GGTA/-	TP53	AGAAGCCCAGACGGAAACC	GGCCCCTGTCATCTTCTGT	CCCTGGTAGGTTTTC	TGCCCTGGTTTTC
PT 315	17:7578406	C/T	TP53	ACAGCACATGACGGAGGTT	CTGCTCACCATCGCTATCTGA	TGAGGCGCTGCCC	TGAGGCACTGCCC
PT 325	17:7574030	G/-	TP53	CAGCTCTCGGAACATCTCGAA	TCCCCCTCCTCTGTTGCT	ACGCCCACGGATCT	CACGCCCACGATCT
* Sequences for these assays are available through Life Technologies: https://www.thermofisher.com/us/en/home/life-science/pcr/real-time-pcr/real-time-pcr-assays/taqman-mutation-detection-
NA - No assay passed QC so none used.
